# Supplementary material for: Ferroelectric surface photovoltage enhancement in chromium-doped SrTiO3 nanocrystal photocatalysts for hydrogen evolution
Source: Royal Society of Chemistry journal article supplement (doi:10.1039/d0ma00463d), 2020-01-01
Supplement: d0ma00463d1.pdf [file d0ma00463d1.pdf]

Supporting Information – 3 pages and 4 figures

# **Ferroelectric Surface Photovoltage Enhancement in Chromium-doped SrTiO<sub>3</sub> Nanocrystal Photocatalysts for Hydrogen Evolution**

**Samutr Assavachin,<sup>a</sup> Benjamin A. Nail,<sup>a</sup> Renato V. Goncalves,<sup>b</sup> Justin R. Mulcahy,<sup>a</sup>**

**Sarah E. Lloyd,<sup>a</sup> and Frank E. Osterloh<sup>a\*</sup>**

<sup>a</sup> Department of Chemistry, University of California Davis, One Shields Avenue, Davis,  
California 95616, United States and

<sup>b</sup> São Carlos Institute of Physics, University of São Paulo, PO Box 369, 13560-970, São Carlos,  
SP, Brazil

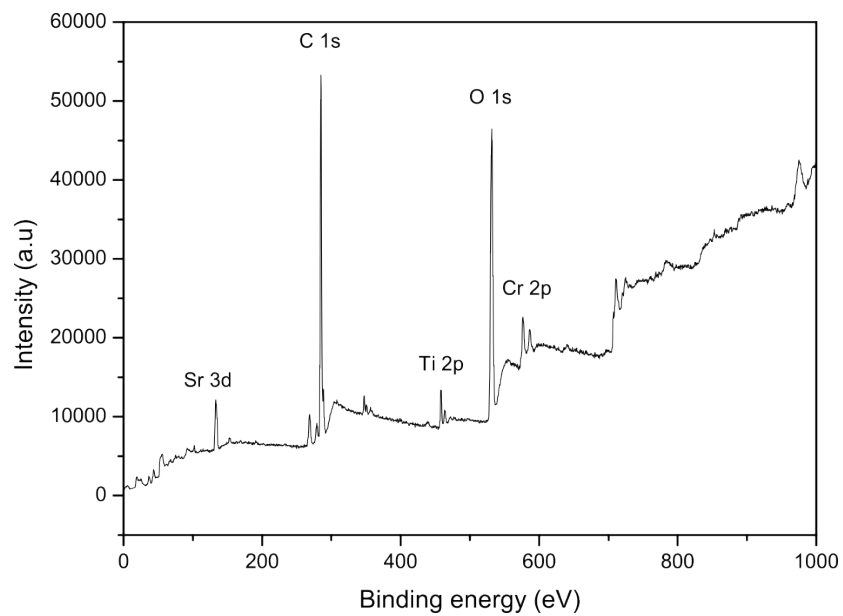

**Figure S1.** X-ray photoelectron survey spectrum.

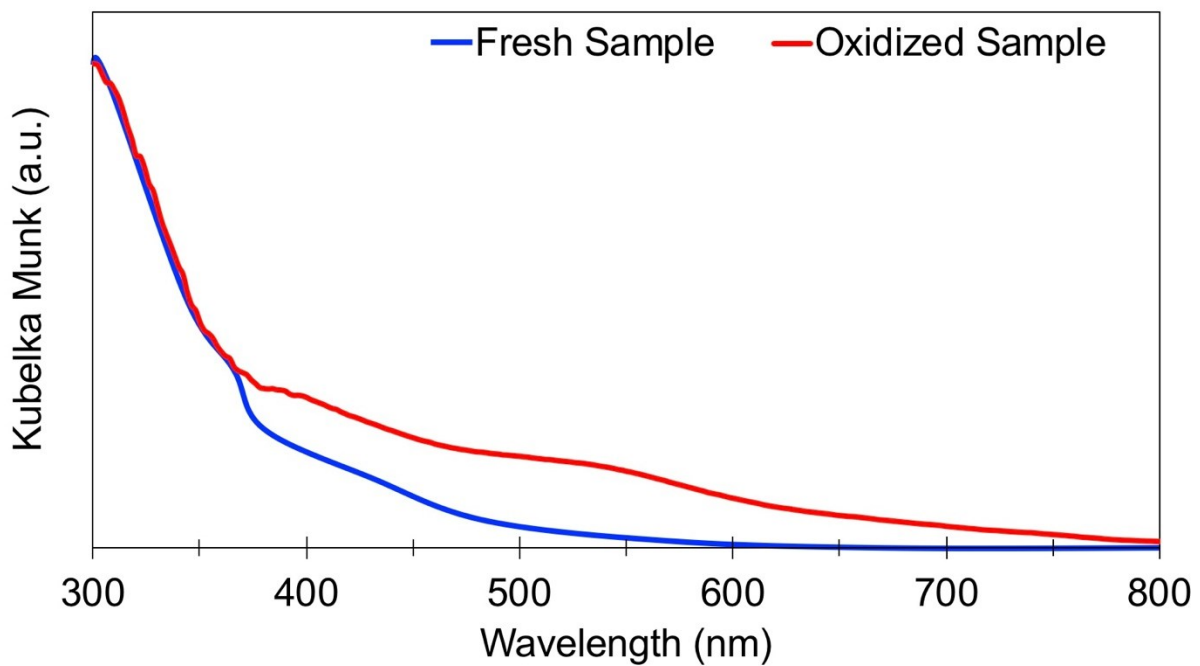

**Figure S2.** KM plot for a fresh and an oxidized SrTiO<sub>3</sub>:Cr film (after storing in air for 3 months).

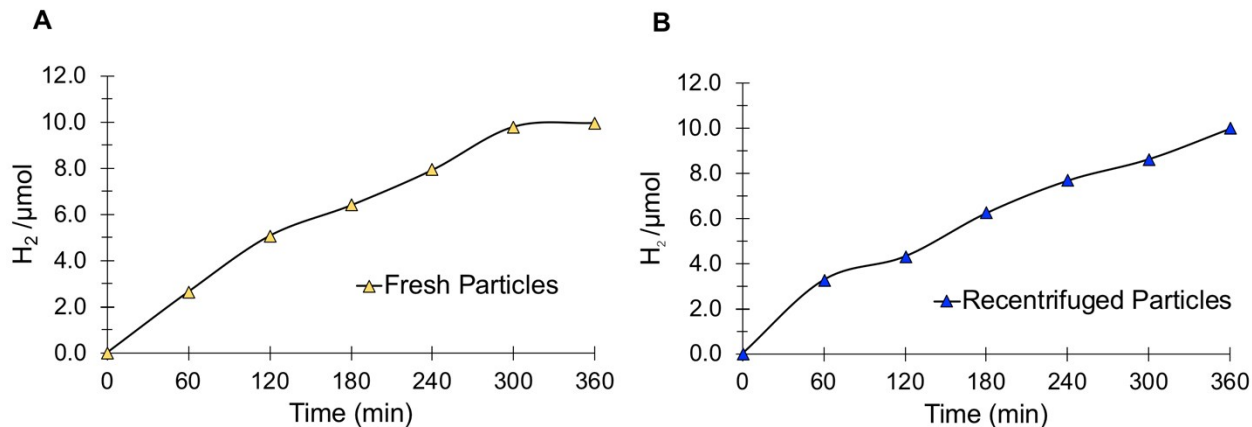

**Figure S3.** AQE Measurement on 0.5%wt Pt - SrTiO<sub>3</sub>:Cr under 435 nm illumination in 20% aqueous methanol solution (irradiation area of 2.01 cm<sup>2</sup>). A) Lamp intensity = 19.3 mW/cm<sup>2</sup> on freshly made sample with AQE = 0.66%. B) 20.91 mW/cm<sup>2</sup> lamp intensity on recentrifuged sample after 6 hours irradiation with AQE = 0.61% (7.6% decrease from original value).

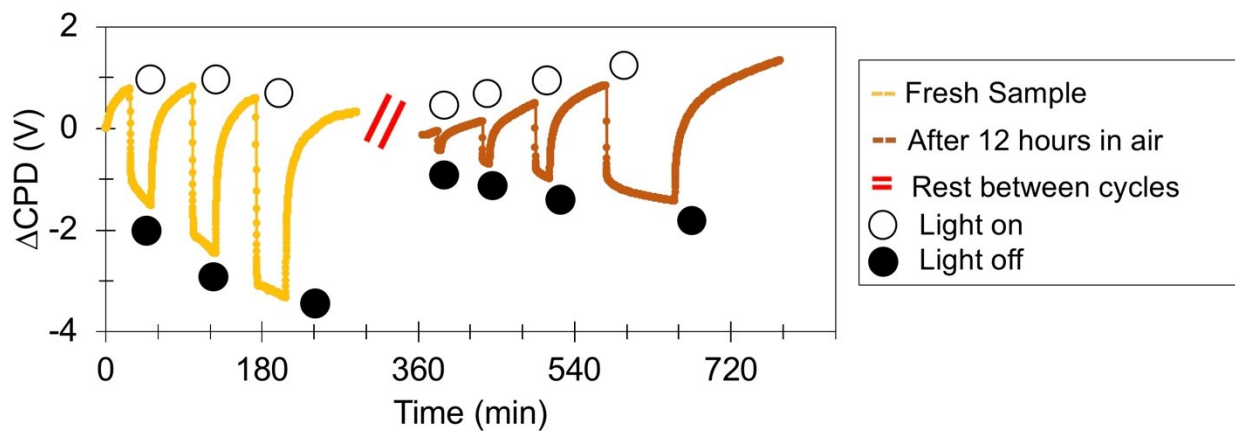

**Figure S4.** Transient photovoltage of Au/SrTiO<sub>3</sub>:Cr under 2.5 eV illumination before and after sample exposure to air (dark) for 12 h.
